# Supplementary material for: Multiple resistance of Colletotrichum truncatum from soybean to QoI and MBC fungicides in Brazil
Source: bioRxiv preprint, doi:10.1101/2022.06.24.497464, version 1 (2022-06-24)
Supplement: Figure S1 [file 497464_file02.docx]

Figure S1. Alignments of *CYP51A* amino acid sequences showing substrate recognition sites (SRS) from *Aspergillus fumigatus* (used as reference) and *Colletotrichum truncatum* isolates from soybean.
